# Supplementary material
Source: publisher figshare collection journal article supplement (https://frontiersin.figshare.com/ndownloader/files/14045087)
Supplement: Supplementary file [file 14045087]

## Supplementary Table 1

### Manuscript:

**Risk and Resilience among Mothers and Fathers of Primary School Age Children with ASD in Malaysia: A Qualitative Constructive Grounded Theory Approach**

**Kartini Ilias, Kim Cornish, Miriam S. Park, Hasnah Toran and Karen J. Golden**

### **Consolidated criteria for reporting qualitative studies (COREQ): 32-item checklist**

Developed from:

Tong, A., Sainsbury, P., and Craig, J. (2007). Consolidated criteria for reporting qualitative research (COREQ): a 32-item checklist for interviews and focus groups. *Int. J. Qual. Health Care* 19, 349–357. doi: 10.1093/intqhc/mzm042

| No. Item                                               | Guide questions/<br>description                                 | Reported<br>on Page # | Additional information                                                                                                                                                                                                                                    |
|--------------------------------------------------------|-----------------------------------------------------------------|-----------------------|-----------------------------------------------------------------------------------------------------------------------------------------------------------------------------------------------------------------------------------------------------------|
| <b>Domain 1:<br/>Research team<br/>and reflexivity</b> |                                                                 |                       |                                                                                                                                                                                                                                                           |
| <i>Personal<br/>Characteristics</i>                    |                                                                 |                       |                                                                                                                                                                                                                                                           |
| 1. Interviewer/<br>facilitator                         | Which author/s<br>conducted the<br>interview or focus<br>group? | Page 6                | Kartini Ilias conducted the 22 parent<br>interviews. Karen J. Golden<br>conducted the key informant<br>interview described in this article.<br>Kartini Ilias conducted 5 additional<br>key informant interviews not<br>described in this current article. |
| 2. Credentials                                         | What were the<br>researcher's<br>credentials? E.g.<br>PhD, MD   | Page 1, 6,<br>and 7   |                                                                                                                                                                                                                                                           |
| 3. Occupation                                          | What was their<br>occupation at the<br>time of the study?       | Page 1 and<br>6       | Kartini Ilias – PhD Student at<br>Monash University Malaysia and<br>Senior Lecturer at Universiti<br>Teknologi MARA, Puncak Alam,<br>Malaysia,<br><br>Karen J. Golden – Senior Lecturer at<br>Monash University Malaysia                                  |

|                                             |                                                                                                                                           |              |                                                                                                                                                                                                                                                                                                                                                                                                       |
|---------------------------------------------|-------------------------------------------------------------------------------------------------------------------------------------------|--------------|-------------------------------------------------------------------------------------------------------------------------------------------------------------------------------------------------------------------------------------------------------------------------------------------------------------------------------------------------------------------------------------------------------|
|                                             |                                                                                                                                           |              | <p>Kim Cornish – Head, School of Psychological Sciences, Monash University and Executive Director at Monash Institute of Cognitive and Clinical Neurosciences (MICCN)</p> <p>Miriam S. Park – Senior Lecturer at Monash University Malaysia</p> <p>Hasnah Toran – Associate Professor at Faculty of Education, Universiti Kebangsaan Malaysia and Autism Centre Director at Permata Kurnia Centre</p> |
| 4. Gender                                   | Was the researcher male or female?                                                                                                        | Page 7       |                                                                                                                                                                                                                                                                                                                                                                                                       |
| 5. Experience and training                  | What experience or training did the researcher have?                                                                                      | Page 6 and 7 |                                                                                                                                                                                                                                                                                                                                                                                                       |
| <i>Relationship with participants</i>       |                                                                                                                                           |              |                                                                                                                                                                                                                                                                                                                                                                                                       |
| 6. Relationship established                 | Was a relationship established prior to study commencement?                                                                               | Page 6 and 7 | The first, fourth and fifth author had a collaborative partnership with some ADS-related organizations from past research projects. However, there was no relationship established between the interviewer and participants prior to the study commencement.                                                                                                                                          |
| 7. Participant knowledge of the interviewer | What did the participants know about the researcher? e.g. personal goals, reasons for doing the research                                  | Page 6 and 7 | Participants were aware that the research was for a doctorate study. Participants did get information from the researcher about the study, such as the goals and reasons for the research, in the detailed explanatory statement. Participants read the written explanatory statement and signed the written informed consent forms prior to the interview.                                           |
| 8. Interviewer characteristics              | What characteristics were reported about the interviewer/facilitator? e.g. Bias, assumptions, reasons and interests in the research topic | Page 6 and 7 |                                                                                                                                                                                                                                                                                                                                                                                                       |

|                                          |                                                                                                                                                          |                     |                                                                                                                                                                                                                                                               |
|------------------------------------------|----------------------------------------------------------------------------------------------------------------------------------------------------------|---------------------|---------------------------------------------------------------------------------------------------------------------------------------------------------------------------------------------------------------------------------------------------------------|
| <b>Domain 2: study design</b>            |                                                                                                                                                          |                     |                                                                                                                                                                                                                                                               |
| <i>Theoretical framework</i>             |                                                                                                                                                          |                     |                                                                                                                                                                                                                                                               |
| 9. Methodological orientation and Theory | What methodological orientation was stated to underpin the study? e.g. grounded theory, discourse analysis, ethnography, phenomenology, content analysis | Page 1, 3, 4, and 5 |                                                                                                                                                                                                                                                               |
| <i>Participant selection</i>             |                                                                                                                                                          |                     |                                                                                                                                                                                                                                                               |
| 10. Sampling                             | How were participants selected? e.g. purposive, convenience, consecutive, snowball                                                                       | Page 6 and 17       |                                                                                                                                                                                                                                                               |
| 11. Method of approach                   | How were participants approached? e.g. face-to-face, telephone, mail, email                                                                              | Page 3, 4, and 6    |                                                                                                                                                                                                                                                               |
| 12. Sample size                          | How many participants were in the study?                                                                                                                 | Page 3, 4, and 5    | <p>22 parent interviews</p> <p>1 professional key informant interview, 350 participants in community engagement events</p> <p>An additional 5 professional key informants were interviewed but this was not a focus nor described in the present article.</p> |
| 13. Non-participation                    | How many people refused to participate or dropped out? Reasons?                                                                                          | Page 6              | All participants who expressed interest to be interviewed participated in the study. All participants' children met the inclusion criteria.                                                                                                                   |
| <i>Setting</i>                           |                                                                                                                                                          |                     |                                                                                                                                                                                                                                                               |
| 14. Setting of data collection           | Where was the data collected? e.g. home, clinic, workplace                                                                                               | Page 6              | Setting and language used were both described on page 6.                                                                                                                                                                                                      |

|                                  |                                                                                   |                                                                    |                                                                                                  |
|----------------------------------|-----------------------------------------------------------------------------------|--------------------------------------------------------------------|--------------------------------------------------------------------------------------------------|
| 15. Presence of non-participants | Was anyone else present besides the participants and researchers?                 | NA                                                                 | Non-participants were not present.                                                               |
| 16. Description of sample        | What are the important characteristics of the sample? e.g. demographic data, date | Page 3, 4, and 5                                                   | See especially Table 1 and 2                                                                     |
| <i>Data collection</i>           |                                                                                   |                                                                    |                                                                                                  |
| 17. Interview guide              | Were questions, prompts, guides provided by the authors? Was it pilot tested?     | Page 3, 4, and 6. Page 3 and 4 focus more about the pilot testing. | See Table 3 on page 6 for the guide.                                                             |
| 18. Repeat interviews            | Were repeat interviews carried out? If yes, how many?                             | Page 4                                                             | No repeat interviews.                                                                            |
| 19. Audio/visual recording       | Did the research use audio or visual recording to collect the data?               | Page 4 and 6                                                       | Audio-recording.                                                                                 |
| 20. Field notes                  | Were field notes made during and/or after the interview or focus group?           | Page 6                                                             | In addition to field notes, a reflexive diary and journal was kept throughout the study process. |
| 21. Duration                     | What was the duration of the interviews or focus group?                           | Page 1, 5, and 6                                                   |                                                                                                  |
| 22. Data saturation              | Was data saturation discussed?                                                    | Page 3 and 4                                                       |                                                                                                  |
| 23. Transcripts returned         | Were transcripts returned to participants for comment and/or correction?          | Page 4                                                             |                                                                                                  |
|                                  |                                                                                   |                                                                    |                                                                                                  |

|                                                |                                                                                                                                    |                                 |                                                                                                                                                                                                                                                                                   |
|------------------------------------------------|------------------------------------------------------------------------------------------------------------------------------------|---------------------------------|-----------------------------------------------------------------------------------------------------------------------------------------------------------------------------------------------------------------------------------------------------------------------------------|
| <b>Domain 3:<br/>analysis and<br/>findings</b> |                                                                                                                                    |                                 |                                                                                                                                                                                                                                                                                   |
| <i>Data analysis</i>                           |                                                                                                                                    |                                 |                                                                                                                                                                                                                                                                                   |
| 24. Number of data coders                      | How many data coders coded the data?                                                                                               | Pages 6 and 7                   |                                                                                                                                                                                                                                                                                   |
| 25. Description of the coding tree             | Did authors provide a description of the coding tree?                                                                              | Pages 6 and 7                   | Coding was summarized on pages 6 and 7. Table 4 in the article does illustrate the themes, subthemes, and categories. A full example of the coding tree was not included as part of the published article.                                                                        |
| 26. Derivation of themes                       | Were themes identified in advance or derived from the data?                                                                        | Page 6 and 7                    | Themes were derived from the data.                                                                                                                                                                                                                                                |
| 27. Software                                   | What software, if applicable, was used to manage the data?                                                                         | Page 6                          |                                                                                                                                                                                                                                                                                   |
| 28. Participant checking                       | Did participants provide feedback on the findings?                                                                                 | Page 4 and 5                    |                                                                                                                                                                                                                                                                                   |
| <i>Reporting</i>                               |                                                                                                                                    |                                 |                                                                                                                                                                                                                                                                                   |
| 29. Quotations presented                       | Were participant quotations presented to illustrate the themes/findings?<br>Was each quotation identified? e.g. participant number | Results section                 | Yes, participant quotations were presented. See results section.<br><br>Quotations were identified. However, there were just a couple of quotations for which the participant pseudonym purposefully was not given due to the more personal or sensitive nature of the quotation. |
| 30. Data and findings consistent               | Was there consistency between the data presented and the findings?                                                                 | Results section                 | Yes. See results section.                                                                                                                                                                                                                                                         |
| 31. Clarity of major themes                    | Were major themes clearly presented in the findings?                                                                               | Results section                 | Yes. See results section                                                                                                                                                                                                                                                          |
| 32. Clarity of minor themes                    | Is there a description of diverse cases or discussion of minor themes?                                                             | Results and Discussion sections | Yes. See results and discussion sections.                                                                                                                                                                                                                                         |
